# Supplementary material for: Early Referral to Nephrological Care and the Uptake of Peritoneal Dialysis. An Analysis of German Claims Data
Source: MDPI journal article supplement (doi:10.3390/ijerph18168359), 2021-08-07
Supplement: s1 [file s1]

## Supplementary Material

**Table S1.** Dialysis-associated EBM and OPS codes and their operationalization for the analysis.

| Service                                                |                                                     | Operationalization for analysis                           |
|--------------------------------------------------------|-----------------------------------------------------|-----------------------------------------------------------|
| EBM codes                                              |                                                     |                                                           |
| 40823                                                  | In-center HD ≥ 18 years                             | Identification of the first HD                            |
| 40824                                                  | In-center HD ≥ 18 years, < 3x per week              | Identification of the first HD                            |
| 40825                                                  | PD, HHD or IPD ≥ 18 years                           | Identification of the first PD, HHD, or IPD               |
| 40826                                                  | PD, HHD, IPD ≥ 18 years, < 4 dialysis days per week | Identification of the first PD, HHD, or IPD               |
| 40827                                                  | IPD or HHD ≥ 18 years, < 3x per week                | Identification of the first HHD or IPD                    |
| 40837                                                  | Addition to 40825 for IPD                           | Differentiation of IPD patients from PD/HHD/IPD           |
| 40838                                                  | Addition to 40827 for IPD                           | Differentiation of IPD patients from PD/HHD/IPD           |
| Addition for the continuous care of a patient with CKD |                                                     |                                                           |
| Mandatory:                                             |                                                     |                                                           |
| 13600                                                  | - GFR < 40 ml/min and/or                            | Identification of the first encounter with a nephrologist |
|                                                        | - Nephrotic syndrome                                |                                                           |
|                                                        | - Information about dialysis and/or transplantation |                                                           |
|                                                        | Optional:                                           |                                                           |
|                                                        | - Counseling of relatives                           |                                                           |
| - Preparation of dialysis and/or transplantation       |                                                     |                                                           |
| 13611                                                  | Addition for the care for PD by the physician       | Verification of PD patients                               |
| OPS codes                                              |                                                     |                                                           |
| 8-853                                                  | Hemofiltration                                      | Identification of the first inpatient hemodialysis        |
| 8-854                                                  | Hemodialysis                                        | Identification of the first inpatient hemodialysis        |
| 8-855                                                  | Hemodiafiltration                                   | Identification of the first inpatient hemodialysis        |
| 8-857                                                  | Peritoneal dialysis                                 | Identification of the first inpatient peritoneal dialysis |

EBM Einheitlicher Bewertungsmaßstab, GFR glomerular filtration rate, HD hemodialysis, HHD home hemodialysis, IPD intermittent peritoneal dialysis, OPS Operationen- und Prozedurenschlüssel, PD peritoneal dialysis.
